1 **Title:** Motor unit recruitment patterns of the quadriceps differ between continuous high- and low-torque  
2 isometric knee extension to momentary failure

3

4 **Running Title:** Recruitment patterns under high- and low-torque to failure

5

6 **Authors:** Jonathan Murphy<sup>a</sup>, Emma Hodson-Tole<sup>b</sup>, Andrew D. Vigotsky<sup>c</sup>, Jim R. Potvin<sup>d</sup>, James P.  
7 Fisher<sup>a</sup>, James Steele<sup>a</sup>

8

9 <sup>a</sup>Solent University, Faculty of Sport, Health, and Social Sciences, Southampton, UK

10 <sup>b</sup>Manchester Metropolitan University, Musculoskeletal Sciences and Sports Medicine Research Centre,  
11 Manchester, UK

12 <sup>c</sup>Northwestern University, Evanston, IL, U.S.A.

13 <sup>d</sup>McMaster University, Hamilton, ON, Canada

14

15 **Corresponding Author:**

16 James Steele ([james.steele@solent.ac.uk](mailto:james.steele@solent.ac.uk))

17 Faculty of Sport, Health, and Social Sciences

18 Southampton Solent University

19 East Park Terrace

20 Southampton

21 Hampshire

22 SO14 0YN

23

24

25

26

27

28

## Recruitment patterns under high- and low-torque to failure

### 29 **Abstract**

30 The size principle is a theory of motor unit (MU) recruitment that suggests MUs are recruited in an  
31 orderly manner from the smallest (lower threshold) to the largest (higher threshold) MUs. A  
32 consequence of this biophysical theory is that, for isometric contractions, recruitment is dependent on  
33 the intensity of actual effort required to meet task demands. This concept has been supported by  
34 modelling work demonstrating that, in tasks performed to momentary failure, full MU recruitment  
35 will have occurred upon reaching failure irrespective of the force requirements of the task. However,  
36 *in vivo* studies examining this are limited. Therefore, the aim of the current study was to examine MU  
37 recruitment of the quadriceps under both higher- and lower-torque (70% and 30% of MVC,  
38 respectively) isometric knee extension, performed to momentary failure. Specifically, we compared  
39 surface electromyography (sEMG) frequency characteristics, determined by wavelet analysis, across  
40 the two continuous isometric knee extension tasks to identify potential differences in recruitment  
41 patterns. A convenience sample of 10 recreationally active adult males (height: 179.6±6.0 cm; mass:  
42 76.8±7.3 kg; age: 26±7 years) with previous resistance training experience (6±3 years) were recruited.  
43 Using a within-session, repeated-measures, randomised crossover design participants performed the  
44 knee extension tasks whilst sEMG was collected from the vastus medialis (VM), rectus femoris (RF)  
45 and vastus lateralis (VL). Myoelectric signals were decomposed into intensities as a function of time  
46 and frequency using an EMG-specific wavelet transformation. Our first analysis compared the mean  
47 frequency at momentary failure; second, we investigated the effects of load on relative changes in  
48 wavelet intensities; finally, we quantified the degree of wavelet similarity over time. Wavelet-based  
49 calculation of the mean signal frequency appeared to show similar mean frequency characteristics  
50 occurring when reaching momentary failure. However, individual wavelets revealed that different  
51 changes in frequency components occurred between the two tasks, suggesting that patterns of  
52 recruitment differed. Low-torque conditions resulted in an increase in intensity of all frequency  
53 components across the trials for each muscle whereas high-torque conditions resulted in a wider range  
54 of frequency components contained within the myoelectric signals at the beginning of the trials.  
55 However, as the low-torque trial neared momentary failure there was an increased agreement between  
56 conditions across wavelets. Our results corroborate modelling studies as well as recent biopsy  
57 evidence, suggesting overall MU recruitment may largely be similar for isometric tasks performed to  
58 momentary failure with the highest threshold MUs likely recruited, despite being achieved with  
59 differences in the pattern of recruitment over time utilised.

60

61

62

63

64

65

66

67

68

69

70

71

## Recruitment patterns under high- and low-torque to failure

### 72 **Introduction**

73           The size principle is a theory of MU recruitment that suggests MUs are recruited in an orderly  
74 manner from the smallest (lower threshold) to the largest (higher threshold) MUs (Denny-Brown and  
75 Pennybacker, 1938; Henneman, 1957) as excitation is increased. A consequence of this biophysical  
76 theory is that recruitment is dependent on the intensity of actual effort required to meet task demands  
77 (Carpinelli, 2008). Therefore, in an exercise task performed to momentary failure, it is argued that an  
78 equivocal population of MUs may be recruited during protocols with both high- and low-loads  
79 (Carpinelli, 2008; Fisher et al., 2017). This concept has been supported by modelling work  
80 demonstrating that, in tasks performed to momentary failure, full MU recruitment will have occurred  
81 upon reaching failure irrespective of the force requirements of the task (Potvin and Fuglevand, 2017).  
82 However, *in vivo* studies examining this are limited.

83           The characteristics of human MUs have been examined for some time using  
84 electromyography (EMG) to measure the electrical activity in the muscles (Hodson-Tole and  
85 Wakeling, 2009; Duchateau and Enoka, 2011). Likely due to its ease of use, surface EMG (sEMG)  
86 was used in several recent studies (Schoenfeld et al., 2014; Jenkins et al., 2015; Looney et al., 2015;  
87 Schoenfeld et al., 2016; Gonzalez et al., 2017; Chapman et al., 2019) in which the aim was to  
88 investigate MU recruitment during exercise tasks under different loading schemes, in attempts to test  
89 the hypothesis of similar MU recruitment. Specifically, these prior studies compared sEMG  
90 amplitudes between higher- and lower-load resistance exercise conditions and found that both mean  
91 and peak sEMG amplitudes are higher when performed using higher loads (Schoenfeld et al., 2014b;  
92 Jenkins et al., 2015; Looney et al., 2015; Schoenfeld et al., 2016; Gonzalez et al., 2017). These  
93 findings led authors to the interpretation that greater MU recruitment occurs under high load  
94 conditions. Although, in some instances, peak amplitudes—particularly at the point of momentary  
95 failure—appear similar (Schoenfeld et al., 2016; Gonzalez et al., 2017; Chapman et al., 2019).  
96 Notwithstanding these findings, some argue that inferences regarding MU recruitment from simple  
97 amplitude-based analyses of sEMG are specious (Enoka & Duchateau, 2015; Fisher et al., 2017;  
98 Vigotsky et al., 2018).

99           Recent work shows that sEMG amplitude, and even median frequency characteristics, are

## Recruitment patterns under high- and low-torque to failure

100 poorly associated to MU recruitment (examined using high density multi-channel electrode arrays) at  
101 a range of force requirements (Del Vecchio et al., 2017). As such, others used alternative  
102 measurements to assess MU recruitment characteristics. Biopsy work lends contradictory evidence to  
103 the conclusions drawn from previous studies: low- and high-load tasks performed to momentary  
104 failure result in similar glycogen depletion despite disparate sEMG amplitudes (Morton et al., 2019).  
105 Thus, the differential sEMG amplitudes observed across loading conditions performed to momentary  
106 failure may, in fact, simply reflect different MU recruitment patterns or signal distortions, while total  
107 MU pool recruitment may still be similar across the tasks (Fisher et al., 2017; Vigotsky et al., 2017;  
108 Vigotsky et al. 2018).

109         There are several potential explanations for why differential sEMG amplitudes can arise with  
110 similar total MU recruitment. First, under higher load (and thus higher force/torque) conditions, a  
111 greater number of MUs need to be recruited synchronously (both higher and lower threshold MUs)  
112 and at increased firing rates in order to produce sufficient force. This highly ‘synchronous’ MU  
113 recruitment might be expected to result in greater sEMG amplitudes. Conversely, a sustained task  
114 using a lower load (and thus lower force/torque) might be expected to initially only recruit sufficient  
115 MUs to produce the necessary force (predominantly lower threshold MUs); however, as the task  
116 continues, previously recruited MUs fatigue and other MUs would need to be recruited to sustain the  
117 required force. Thus, at a given instance in time, relative to momentary failure during a sufficiently  
118 lower load condition, it might be expected that the number of MUs being recruited would be fewer  
119 than during higher load conditions, resulting in a lower sEMG amplitude. Second, sEMG amplitudes  
120 may also be constrained by changes in MU action potential shape at momentary failure under  
121 submaximal conditions, meaning that the observed amplitudes reflect changes in the peripheral  
122 environment rather than just neural drive (Dimitrova and Dimitrov, 2003; Dideriksen et al., 2011).  
123 Third, ‘sequential’ MU recruitment, from lower threshold to higher threshold MUs, during fatiguing  
124 contractions may be permitted by reductions in recruitment thresholds (Adam and DeLuca, 2003;  
125 Contessa et al., 2016), suggesting that as momentary failure is neared the number of MUs recruited  
126 may be similar between higher and lower load conditions. Fourth, it has also been argued MUs may  
127 also ‘cycle’ to maintain force requirements (Jensen et al., 2000; Westad et al., 2003; Bawa et al.,

## Recruitment patterns under high- and low-torque to failure

128 2006). Under such circumstances, the total number of MUs recruited at any given point might be  
129 lower during lower load conditions, but instantaneous recruitment may not be indicative of  
130 recruitment across the duration of a trial. Fifth, firing rate adapts to the greatest degree in higher  
131 threshold MUs, which may further reduce measured EMG amplitudes even at momentary failure with  
132 all MUs recruited (Sawczuk et al., 1995; Gorman et al., 2005; Reville & Fuglevand, 2011), particularly  
133 under lower load conditions where the longer durations allow for more pronounced adapted decreases  
134 in firing rates (Potvin & Fuglevand, 2017). If performed to momentary failure it might be expected  
135 that eventually all available MUs would have been recruited in either higher- or lower-load conditions  
136 (Potvin & Fuglevand, 2017); however, potentially differing patterns of recruitment may occur.

137         The exact MU recruitment patterns during high- and low-load fatiguing tasks remain  
138 somewhat elusive (Fisher et al., 2017). Mammalian skeletal muscle is composed of a range of  
139 different fibre types (Schiaffino and Reggiani, 1994) that generate a range of myoelectrical properties  
140 during muscle activation (Wakeling and Syme, 2002). To examine MU recruitment during exercise to  
141 momentary failure, techniques more advanced than simple amplitude and frequency analyses may be  
142 required, such as spike-triggered averaging (Boe et al., 2004) or decomposition using high-density  
143 multi-channel electrode arrays (Del Vecchio et al., 2017). Indeed, a recent study by Muddle et al.,  
144 (2018) used decomposition sEMG to examine MU recruitment and firing behaviours of the vastus  
145 lateralis during repeated isometric knee extension to momentary failure with both higher- and lower-  
146 torque conditions. They reported that, although both conditions resulted in recruitment of additional  
147 higher threshold MUs to maintain torque production, on average, there was greater recruitment of  
148 larger MUs in the higher-torque condition. To our knowledge, this is the first study to have examined  
149 MU behaviour under different torque requirements using such a technique. Though, another recent  
150 study (Harmon et al., 2021) has also examined motor unit action potentials (MUAPs) using  
151 decomposition sEMG in non-fatiguing high-torque and fatiguing low-torque conditions performed to  
152 momentary failure, suggesting similar MUAPs between conditions when the latter reached  
153 momentary failure. However, it is acknowledged that there is debate with respect to the validity of  
154 this approach (Farina and Enoka, 2011; De Luca and Nawab, 2011; Enoka, 2019; DeFreitas, 2019),  
155 and, thus, further independent examination of MU behaviour under different conditions is needed with

## Recruitment patterns under high- and low-torque to failure

156 complementary methods.

157           One approach to analyse and extract MU behaviour from bipolar sEMG recordings is  
158 wavelet-based analysis of frequency components. This technique was proposed by von Tscharner  
159 (2000) and has been successfully used to examine recruitment patterns of lower and higher threshold  
160 MUs in a range of applications using EMG (von Tscharner, 2002; von Tscharner & Goepfert, 2006;  
161 Wakeling & Rozitis, 2004; Hodson-Tole & Wakeling, 2007; Lee et al., 2011). Indeed, these  
162 techniques can also be applied to sEMG (Wakeling et al., 2001; Wakeling, 2009a; Wakeling, 2009b).  
163 Traditional analysis of sEMG frequency components typically considers mean/median frequency  
164 values, where all frequency components are banded together (e.g. Jenkins et al., 2015). This  
165 examination of frequency characteristics where all frequency components are banded together limits  
166 understanding of the aetiology of these mean/median frequency shifts (e.g., a reduction in mean  
167 frequency could reflect an increase in lower frequency components or a decrease in higher frequency  
168 components). In contrast, wavelet analysis quantifies signal power within defined frequency  
169 bandwidths, enabling a finer-grained assessment of the interplay between low and high frequency  
170 components, which are related to the excitation of smaller and faster motor unit populations,  
171 respectively (Hodson-Tole and Wakeling, 2009; Lee et al., 2011).

172           The aim of the current study, therefore, was to use a wavelet-based analysis to examine MU  
173 recruitment of the quadriceps under both higher- and lower-torque conditions (70% and 30% of MVC,  
174 respectively) using an isometric knee extension model performed to momentary failure. Specifically,  
175 we compared sEMG frequency characteristics across two continuous isometric knee extension tasks  
176 (low- and high-load) performed to momentary failure. By doing so, we sought to identify potential  
177 differences in recruitment patterns, especially at momentary failure, as determined by wavelet  
178 analysis.

179

## 180 **Methods**

### 181 *Experimental Design*

182           A within-session, repeated-measures, randomised crossover design was adopted to examine  
183 and compare MU recruitment patterns during isometric knee extensions with both high- and low-load

## Recruitment patterns under high- and low-torque to failure

184 demands performed to momentary failure. The study was approved by the Centre of Health, Exercise  
185 and Sport Science Research Ethics Committee (ID No. 582) meeting the ethical standards of the  
186 Helsinki declaration and was conducted within the Sport Science Laboratories at Southampton Solent  
187 University.

188

### 189 Participants

190 A convenience sample of 10 recreationally active adult males (height:  $179.6 \pm 6.0$  cm; mass:  
191  $76.8 \pm 7.3$  kg; age:  $26 \pm 7$  years) with previous resistance training experience ( $6 \pm 3$  years) were recruited.  
192 Exclusion criteria were based upon illness or any contraindications to physical activity identified  
193 using a physical activity readiness questionnaire, though no one was excluded. All participants read a  
194 participant information sheet, were afforded the opportunity to ask any questions, and then completed  
195 informed consent forms before any testing commenced.

196

### 197 Equipment

198 Stature was measured using a wall-mounted stadiometer (Harpenden stadiometer, Holtain  
199 Ltd, UK) and body mass was measured using balance scales (Seca 710 flat scales, UK). Trials were  
200 performed on an isokinetic dynamometer (Humac Norm, CSMi, USA). Surface electromyography  
201 was measured using a Trigno Digital Wireless sEMG System (Delsys, USA). Torque and sEMG  
202 signals were collected using the isokinetic dynamometer and sEMG systems, respectively, which  
203 were synced using a Trigno Analogue Adaptor (Delsys, USA); both torque and sEMG signals were  
204 recorded using the EMGworks Acquisition software (Delsys, USA).

205

### 206 Testing

207 Two different conditions were examined: single continuous isometric efforts to momentary  
208 failure at 30% MVC and at 70% MVC. Both conditions were counterbalanced between participants as  
209 to whether they would perform either the 30% or 70% condition first, separated by a 20-minute rest.  
210 Prior to each condition, MVCs were performed and participants were instructed to apply maximal  
211 isometric effort against a fixed resistance at  $45^\circ$  of knee flexion. This procedure was completed before

## Recruitment patterns under high- and low-torque to failure

212 each condition to determine the respective absolute torque demands for each participant that equated  
213 to 30% and 70% of MVC; that is to say, each trial was normalised to the preceding MVC. Participants  
214 were instructed to gradually build up to a maximal effort over 3 seconds and were instructed to  
215 gradually reduce their effort once it was clear that a max torque had been achieved (i.e. when the  
216 torque reading was no longer increasing). In all conditions, knee angle was set at 45° flexion (0° = full  
217 extension) to standardise the exercise between participants. Before testing started, participants  
218 completed a standardised warm up of 20 body weight squats.

219 Each participant was instructed to perform an isometric effort with enough torque to reach  
220 their respective load for each condition. Participants were provided with a visual aid in the form of a  
221 horizontal on-screen torque bar with limits set at 70±5% and 30±5% of MVC for the high- and low-  
222 load conditions, respectively. Participants were instructed to generate enough torque to ensure a  
223 vertical on-screen torque bar was between the lower- and upper-limits until momentary failure.  
224 Participants were verbally encouraged throughout; if they fell below the lower torque limit, they were  
225 encouraged to attempt to regain their set torque output. Momentary failure was defined as when  
226 participants could no longer generate enough torque to keep within the torque limits set, despite  
227 exerting maximal effort (Steele et al., 2017).

228

### 229 Surface Electromyography

230 Surface electromyography was recorded during each condition for the vastus medialis (VM),  
231 rectus femoris (RF) and vastus lateralis (VL). Electrode placement was made according to  
232 recommendations from the Surface Electromyography for the Non-invasive Assessment of Muscles  
233 (SENIAM) project (<http://www.seniam.org/>). Participants' skin was shaved and cleaned using an  
234 alcohol-free cleansing wipe at the site used for electrode placement. Raw signals were collected at  
235 2000 Hz.

236

### 237 Wavelet Based Analysis

238 Myoelectric signals were decomposed into intensities as a function of time and frequency  
239 using an EMG-specific wavelet transformation (von Tscharner, 2000). A filter bank of 11 non-linearly



## Recruitment patterns under high- and low-torque to failure

240 scaled wavelets ( $k \in \{0,1, \dots, 10\}$ ), with central frequencies ( $f_c$ ) spanning 6.90–395.44 Hz, was used.  
241 To quantify features of signal amplitude, the total intensity at each time point ( $I_t$ ) was calculated by  
242 summing the intensities over wavelets  $1 \leq k \leq 10$ . Exclusion of the first wavelet ( $k = 0$ ) ensures low  
243 frequency content, associated with factors such as movement artefact, were not included in the  
244 analysis. The total intensity calculated is comparable to twice the square of the root mean square value  
245 (Wakeling et al., 2002).

246 To quantify changes in signal content within each frequency domain, changes in the intensity  
247 within each domain were calculated. Within each wavelet domain, an intensity ( $I_{j,k}$ ) was calculated  
248 for each sample point ( $j$ ). During the trials, the intensity changed as a function of trial duration. The  
249 rate of change was calculated as the slope of the linear least squares fit of  $\log I_k$  plotted as a function  
250 of trial duration (0 to 1, representing the beginning and end of the trial, respectively). This describes  
251 the exponential change, expressed as the percentage change of  $I_k$  per trial.

252 In addition, the mean signal frequency ( $\bar{f}$ ) of each trial was calculated to facilitate a more  
253 direct comparison with previous literature, wherein mean or median frequency analyses are reported.  
254 This also enabled us to contrast the mean frequency results with those from our wavelet-based  
255 analyses. Here, mean frequency was calculated from wavelet transformed data ( $k = 1 - 10$ ) using the  
256 weighted mean,

$$257 \quad \bar{f} = \frac{\sum_k f_c(k) I_k}{\sum_k I_k},$$

258 for both the start and end of the trials. The start and end of the trial was defined by torque thresholds  
259 of 25% (start) and 75% (end) of the mean torque throughout the trial. The changes in signal intensity  
260 within each frequency band were calculated between these two points so as to remove the effects of  
261 the ramping up/down of torque at the start/end of the trials. All analysis of EMG data was performed  
262 in Mathematica (version 11.1, Wolfram).

263

### 264 Statistical Analysis

265 All code and data used for this study are available on the Open Science Framework  
266 (<https://osf.io/g2z4w/>). To assess the effects of load on the myoelectric signal, we performed

## Recruitment patterns under high- and low-torque to failure

267 statistical analysis in R (version 4.0.2; R Core Team, 2020). Before performing inferential analyses to  
268 answer our research question, we first visually inspected and quantified the effects of set order and  
269 condition on MVC and time to momentary failure. These were considered descriptive analyses and  
270 are presented using individual data points and mean  $\pm$  SD or geometric mean \* geometric SD.  
271 Descriptions of trial durations and their differences were performed on the geometric (log) scale, and  
272 as such, are presented multiplicatively.

273 Our first analysis compared the mean frequency at momentary failure between the two loads  
274 (30 vs. 70% MVC), after adjusting for initial mean frequency. We created a linear mixed-effects  
275 model that was parameterized as an analysis of covariance,

$$276 \quad \bar{f}_{ij}^{End} = (\beta_{00} + u_{0j}) + \beta_{10}\bar{f}_{ij}^{Start} + \beta_{20}Condition_{ij} + e_{ij},$$

277 for row  $i$  in participant  $j$ , and where  $u_{0j}$  is a random effect for participant  $j$ ,  $\bar{f}$  is mean frequency, and  
278 *Condition* is dummy-coded 0 for 30% and 1 for 70% MVC. Each muscle was fit in a separate model  
279 due to convergence issues when attempting to fit them together. Since the residuals were not normally  
280 distributed, compatibility intervals (CI) for the effect of condition ( $\beta_{20}$ ) were generated using the basic  
281 (reverse percentile) bootstrap with 500 replicates.

282 Second, we investigated the effects of load on relative changes in wavelet intensities. We  
283 created a linear mixed-effects model in which we parameterized a mean-centred  $\log(f)$  to linearize the  
284 relative change-frequency relationship. The resulting mixed-effects model, in Pinheiro-Bates-  
285 modified Wilkinson-Rogers notation (Wilkinson and Rogers, 1973; Pinheiro and Bates, 2000) for  
286 brevity's sake, was

$$287 \quad I \sim \text{Muscle} * \text{Freq} * \text{Condition} + (\text{Freq} + \text{Condition} + \text{Muscle} | \text{Participant}),$$

288 where *Condition* was dummy-coded 0 for 30% and 1 for 70% MVC. The mean-centring of the  $\log(f)$   
289 decreased collinearity between random effects, allowed for our intercepts to be interpretable, and  
290 enabled the model to converge on a solution with normally distributed and homoscedastic residuals.  
291 Thus, we parametrically calculated the CIs using estimated marginal means on the fixed effects (as a  
292 function of frequency, conditional on muscle and loading condition) and their contrasts with  
293 Satterthwaite degrees-of-freedom approximation (Lüdtcke, 2018; Lenth, 2020).

## Recruitment patterns under high- and low-torque to failure

294 Finally, we quantified the degree of wavelet similarity over time. Each high- and low-load  
295 trial was respectively summarized by a 10 (wavelets)  $\times$  1000 (time points) matrix, with which we  
296 generated a 1000 $\times$ 1000 concordance cross-correlation matrix for each muscle for each participant  
297 (Vigotsky, 2020). For example, a participant's VM wavelet intensities from the 30% and 70% trials  
298 were used to generate a 1000 $\times$ 1000 matrix, with each element corresponding to the absolute  
299 agreement in wavelet intensities between time  $i$  in the 30% trial and time  $j$  in the 70% trial, and where  
300 agreement was quantified using Lin's concordance correlation coefficients. We used linear mixed-  
301 effects models to summarize these concordance correlation matrices. Three models—one for each  
302 muscle—quantified the effect of trial duration on wavelet intensity agreement, wherein the  
303 percentages of trial duration of the 30% and 70% conditions were used as regressors and the  
304 concordance correlation coefficient ( $\rho^c$ ) at that time point was the response variable,

$$305 \rho_{ij}^c = (\beta_{00} + u_{0j}) + (\beta_{10} + u_{1j})t_{ij}^{30\%} + (\beta_{20} + u_{2j})t_{ij}^{70\%} + e_{ij}.$$

306 We allowed slopes and intercepts to vary and, here, we report parameter estimates (fixed-effects)  
307 along with participant-level variances (random-effects).

308 In addressing our research questions, we took an estimation approach rather than hypothesis-  
309 testing approach since we were neither interested in dichotomizing our findings nor comparing them  
310 to a null model (Gardener and Altman, 1986; Amrhein et al., 2019). Effects and their precision, along  
311 with the conclusions based on them, were interpreted continuously and probabilistically, considering  
312 data quality, plausibility of effect, and previous literature, all within the context of each outcome  
313 (Amrhein et al., 2019; McShane et al., 2019).

314

## 315 **Results**

### 316 MVC and Time to Momentary Failure

317 Reductions in MVC were not appreciable between the first and second trial, nor between  
318 those who completed the trials in a different order (i.e., 30% vs. 70% first) (Figure 1A). Time-to-  
319 momentary failure was, on average, 3.3  $\times$  1.3 -times longer (geometric mean  $\times$  geometric SD) for the  
320 low torque trial condition compared with the high torque trial condition. In contrast to the MVCs,

## Recruitment patterns under high- and low-torque to failure

321 there was an order effect for time-to-momentary failure. Specifically, 30% trial durations were an  
322 average of 46% longer when the 30% trial preceded the 75% trial, but 70% condition were only 26%  
323 longer when the 70% trial preceded the 30% trial (Figure 1B). Since there was an effect of order on  
324 set duration in our sample (not necessarily inferentially), we visually ensured that there was no salient  
325 effect of set duration for other outcomes. These visual checks can be found in our supplementary  
326 material.

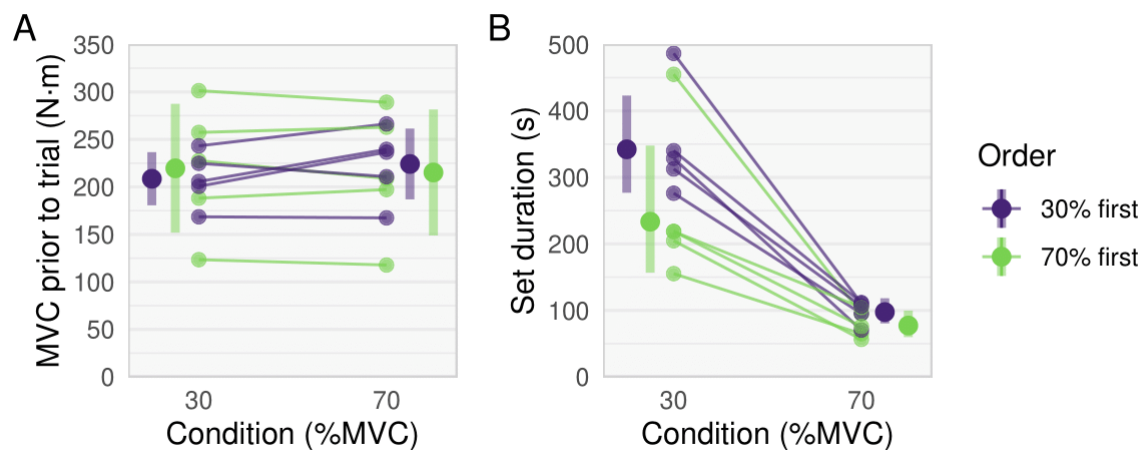

327

328

329 **Figure 1. (A)** MVC prior to trial and **(B)** set durations for each participant for the 30% and 70% conditions.  
330 Thick dots and error bars are mean  $\pm$  SD in **(A)** and geometric mean \* geometric SD in **(B)** and participants  
331 performing the 30% condition first are shown in purple, and those performing the 70% condition first are shown  
332 in green.  
333

334

### 334 Mean Frequency

335

336

337

338

339

340

As calculated from the wavelet transformed signals, there was a decrease in mean frequency from the start to the end of both the low- and high-load trial conditions. These frequencies were similar across load conditions (Figure 2). This is supported by the ANCOVAs, which showed minimal effects of load on mean frequency at momentary failure for the rectus femoris (effect of 70% relative to 30% ( $CI_{95\%}$ ) = 3 Hz (-14, 21)), vastus lateralis (-0.7 Hz (-21, 17)), and vastus medialis (5 Hz (-12, 25)).

## Recruitment patterns under high- and low-torque to failure

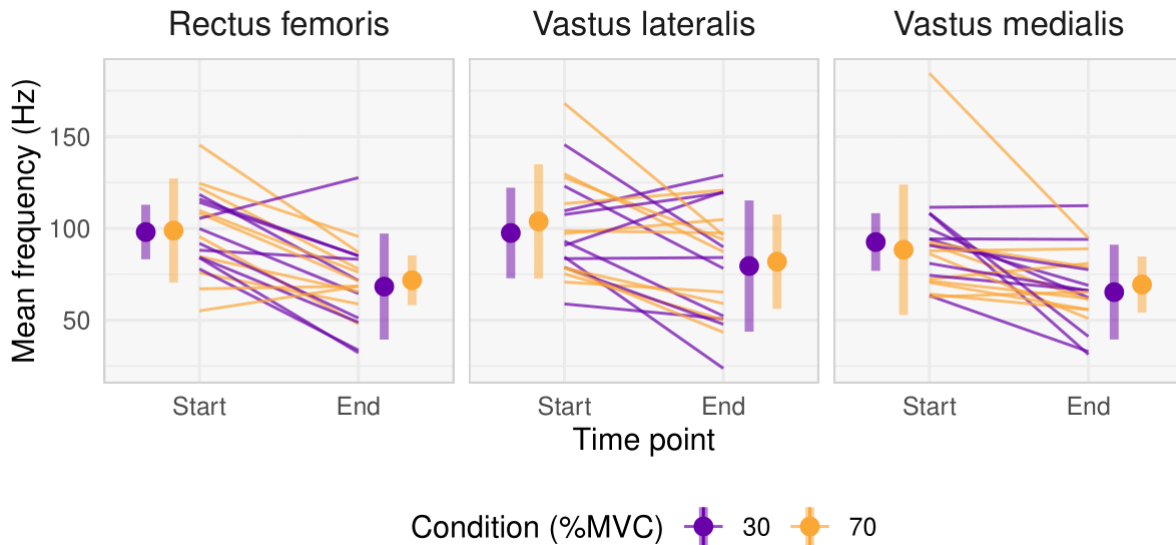

341 **Figure 2.** Start and End mean frequencies for the rectus femoris, vastus lateralis and vastus medialis for each  
342 participant. Thick dots and error bars are mean  $\pm$  SD and participants performing the 30% condition first are  
343 shown in purple, while those performing the 70% condition first are shown in orange.  
344  
345

### 346 Wavelet Analysis

347 At the start of each muscle's 30% condition, the greatest intensities occurred at the lower  
348 frequencies, with relatively little signal content at higher frequencies (dark blue in Figure 3). As the  
349 trial progresses, intensity increases in the low-to-mid frequency ranges while greater intensities are  
350 also shown to occur in the higher frequency components after approximately 60% of the trial duration  
351 (green-yellow in Figure 3).

352 In the 70% condition, there is initially intensity across all frequencies (note colours extend the  
353 whole frequency spectrum in Figure 3), with the greatest intensities at mid-to-low frequencies. Over  
354 the course of the trial, there is an increase in intensity visible in the lower frequencies (note region  
355 displaying green-yellow colour in Figure 3). The reduction in intensity of the higher frequencies is not  
356 as visible in these figures but, for example, some loss of intensity can be seen in the highest wavelets  
357 at the very end of the trial, particularly in the RF.

### Recruitment patterns under high- and low-torque to failure

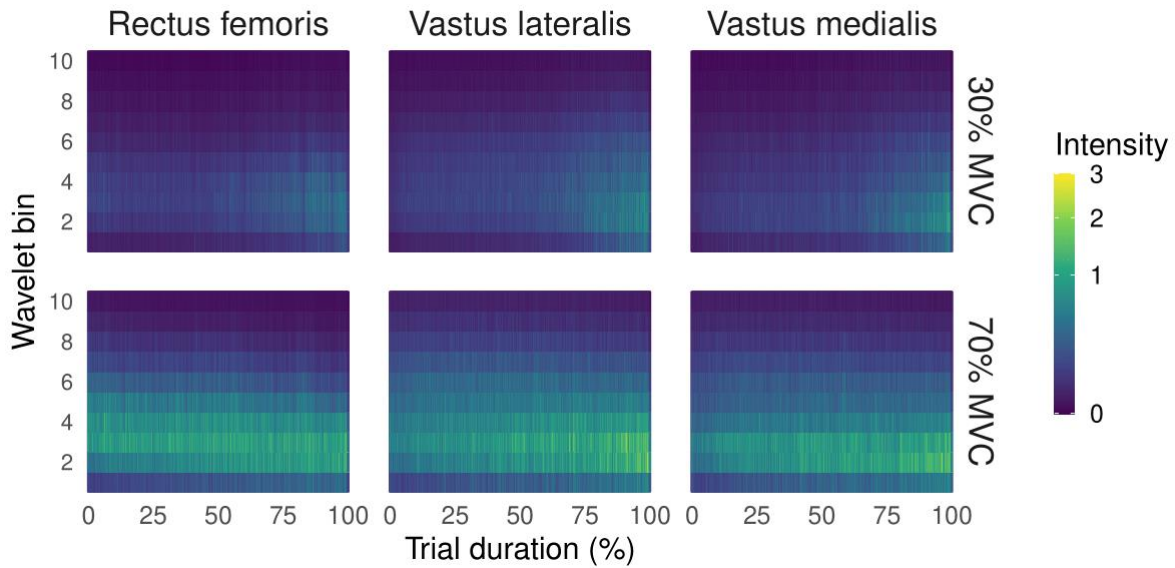

358

359 **Figure 3.** Spectrograms of wavelet intensities across time. Time is normalised to percentage of trial duration  
360 (%) across the *x*-axis; the *y*-axis indicates the wavelet bin number, with higher bin numbers corresponding to  
361 higher frequencies. Color indicates intensity of the wavelet bin at a given time point.

362

#### 363 *Wavelet Agreement*

364 Concordance correlation coefficients increased with respect to the duration of the 30% trial  
365 and either decreased slightly (VM and VL) or remained the approximately the same (RF) with respect  
366 to the 70% trial (Table 1, Figure 4).

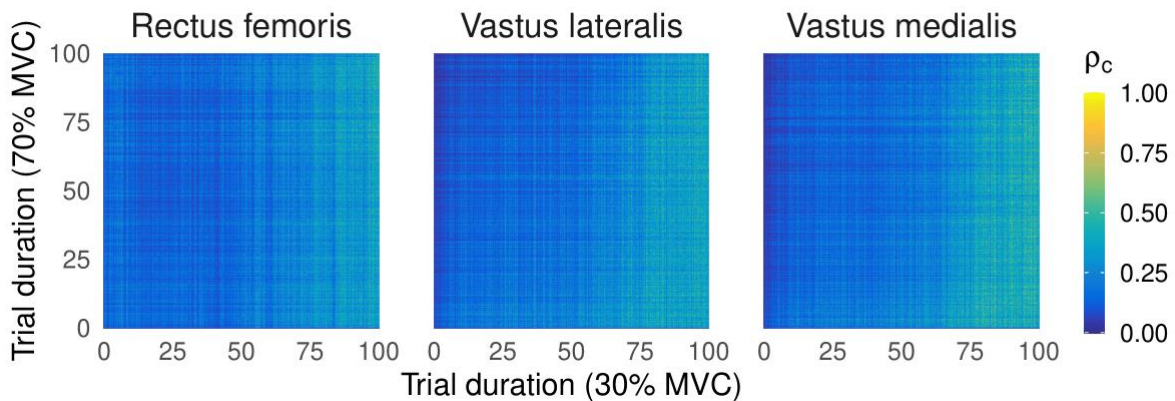

367

368 **Figure 4.** Average absolute agreement of wavelet intensity vectors across trial durations. Each point represents  
369 the average concordance correlation coefficient between the wavelet intensity vector from % of trial duration on  
370 the *x* axis for the 30% trial and % of trial duration on the *y* axis of the 70% trial.

371

372

373

Recruitment patterns under high- and low-torque to failure

374 **Table 1.** Relationship between trial durations and the agreement of wavelet intensities.

| Muscle           | Parameter             | Estimate ± SD |
|------------------|-----------------------|---------------|
| Vastus medialis  | Intercept             | 0.09 ± 0.11   |
|                  | Time of 30% MVC trial | 0.30 ± 0.13   |
|                  | Time of 70% MVC trial | -0.07 ± 0.06  |
| Rectus femoris   | Intercept             | 0.09 ± 0.08   |
|                  | Time of 30% MVC trial | 0.21 ± 0.13   |
|                  | Time of 70% MVC trial | 0.00 ± 0.13   |
| Vastus lateralis | Intercept             | 0.11 ± 0.11   |
|                  | Time of 30% MVC trial | 0.26 ± 0.11   |
|                  | Time of 70% MVC trial | -0.08 ± 0.07  |

Note: Times range from 0 (start of trial) to 1 (end of trial), meaning each intercept is the agreement at  $t=0$  and the slopes represent the average change in the concordance correlation over the duration of the trial (unlike in Figure 4 where time is normalised from 0-100% of trial duration). SD indicates the standard deviation associated with the random- (or participant level-) effects rather than fixed- (or time level-) effects.

375

376 Relative Change in Signal Intensity Across Wavelets

377 Across all muscles, the 30% condition had greater increases in wavelet intensities, and these  
 378 changes were more uniform across the frequency spectrum (Table 2, Figure 5). During the low-torque  
 379 trials, it is clear there was an increase in intensity across the whole frequency spectrum studied, but  
 380 these increases are larger for the lower frequencies. In contrast, during the high-torque trials, there  
 381 was an increase in signal intensity of the lower frequency components, but a decrease in the intensity  
 382 of the higher frequency components. The transition between increasing and decreasing occurs at  
 383 different frequencies in the three muscles: ~200 Hz in VM, ~75 Hz in RF, and ~150 Hz in VL.

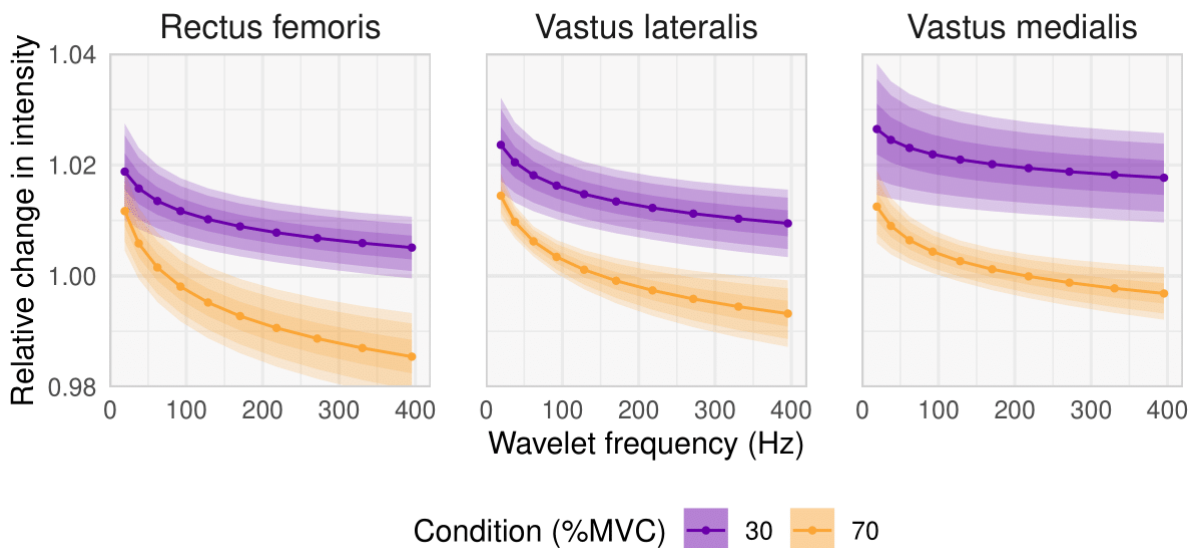

384  
 385  
 386  
 387  
 388  
 389

**Figure 5.** Relative changes in wavelet intensities across for each muscle for the 30% and 70% conditions. Lines and ribbons are from estimated marginal means on the model's fixed effects with Satterthwaite degrees-of-freedom approximation. The ribbons indicate CIs at the 68, 95, and 99% level, corresponding to approximately 1, 2, and 3 standard errors.

## Recruitment patterns under high- and low-torque to failure

390 **Table 2.** Wavelet intensity intercepts and slopes for each muscle for the 30% and 70% conditions.

|                     |           | Rectus femoris       | Vastus lateralis     | Vastus medialis      |
|---------------------|-----------|----------------------|----------------------|----------------------|
| 30% MVC             | Intercept | 1.009 ± 0.002        | 1.013 ± 0.002        | 1.020 ± 0.004        |
|                     | Slope     | -0.005 ± 0.001       | -0.005 ± 0.001       | -0.003 ± 0.001       |
| 70% MVC             | Intercept | 0.993 ± 0.003        | 0.999 ± 0.002        | 1.001 ± 0.001        |
|                     | Slope     | -0.009 ± 0.001       | -0.007 ± 0.001       | -0.005 ± 0.001       |
| Contrast (30 – 70%) | Intercept | 0.017 (0.009, 0.024) | 0.014 (0.006, 0.022) | 0.019 (0.011, 0.027) |
|                     | Slope     | 0.004 (0.003, 0.005) | 0.002 (0.001, 0.004) | 0.002 (0.001, 0.004) |

Note: Estimates and contrasts are based on estimated marginal means with Satterthwaite degrees-of-freedom approximations. Data are presented as estimate ± SE and estimate (CI<sub>95%</sub>).

## 391 392 **Discussion**

393 This appears to be the first study to examine MU recruitment patterns *in vivo* using wavelet-  
394 based analysis of sEMG under both high- and low-torque conditions to momentary failure. Wavelet-  
395 based calculation of the mean signal frequency appeared to show similar mean frequency  
396 characteristics when reaching momentary failure. However, inspection of the individual wavelets  
397 reveals that changes differed between frequency components, suggesting that patterns of recruitment  
398 may have differed. Low-torque conditions resulted in an increase in intensity of all frequency  
399 components across the trials for each muscle (Figures. 2-3). This suggests evidence of additional MU  
400 recruitment (both lower and higher threshold MUs), likely to maintain torque production throughout  
401 the task. In contrast, high-torque conditions resulted in a wider range of frequency components  
402 contained within the myoelectric signals at the beginning of the trials (Figure. 3), suggesting an initial  
403 recruitment of a wider range of MUs. However, as the low-torque trial neared momentary failure there  
404 was an increased agreement between conditions across wavelets (Figure. 4). In addition, there was an  
405 increase in the signal intensity within low- to mid-frequencies over the trial while a reduction in  
406 higher frequency components occurred (Figure. 5). This potentially suggests firing rate adaptations or  
407 changes in conduction velocity occurred in higher threshold MUs as the trial progressed. These  
408 findings are also in line with those expected from recent modelling (Potvin and Fuglevand, 2017)<sup>1</sup>.

409 The differences in signal intensity changes within the different frequency components,  
410 between the high- and low-torque conditions, is quite striking (Figure. 5). In both cases, there is a

---

<sup>1</sup> Indeed, for comparison we have rerun the model from Potvin and Fuglevand (2017) using the 30% and 70% conditions used in the present study and include these in the supplementary materials. We show the adapted MU strength and firing rates over time for the whole trials and the final 30% of time for the 30% condition trial (supplementary file <https://osf.io/9jznr/>).



## Recruitment patterns under high- and low-torque to failure

411 relatively greater increase in the low frequency content compared to high frequencies. This increase  
412 could be representative of several factors, including MU recruitment. However, this must be  
413 interpreted with caution as these changes could equally result from fatigue-related changes in  
414 membrane properties that would influence both action potential shape and conduction velocity and,  
415 therefore, the signal frequency components (Mortimer et al., 1970; Brody et al., 1991; Dimitrova and  
416 Dimitrov 2003; Dideriksen et al., 2011). Given that the increase in lower frequency components is  
417 common to both high- and low-torque trials, we can only speculate as to the cause of these changes.

418 In contrast, relative changes in wavelet intensities differed between conditions. These  
419 differences were especially apparent in the higher frequency components in each of the three muscles.  
420 An increase in relative change across all frequencies was a common feature of each of the three  
421 muscles for the low torque trial, while intensity reductions within the higher frequencies occurred for  
422 high torque trials (Figure. 3). The fact that opposite effects were observed between the two conditions  
423 indicates that different myoelectric signal properties resulted from the two conditions. The increases  
424 seen during the low-torque trials could be indicative of recruitment of larger high-threshold MU  
425 populations, which may have occurred in response to the growing fatigue. The reduction in the  
426 intensity, within the higher frequency components during the high-torque trials, could be indicative of  
427 reduced recruitment of these populations of larger motor units, potentially resulting from them  
428 becoming fatigued. Alternatively, this latter effect in the high torque conditions could also be due to  
429 changes in action potential shape and conduction velocity from fatigue (Mortimer et al., 1970; Brody  
430 et al., 1991) or firing rate adaptations as previously mentioned (Potvin & Fuglevand, 2017).

431 Our analyses of different frequency components revealed different recruitment patterns across  
432 the conditions, which could not be identified through amplitude or mean frequency analyses alone. As  
433 a point of comparison with our wavelet analyses and with other literature (e.g. Jenkins et al., 2015), as  
434 mean frequency is commonly used as a crude assessment of MU recruitment (Phinyomark et al,  
435 2012), we examined the mean frequency across the individual wavelets (Ranniger and Akin, 1997). In  
436 the present study, we found that mean frequency decreased similarly across both conditions and  
437 muscles. However, our wavelet-based analyses provide further insight into why such mean frequency  
438 changes occur which, in this case, were likely a result of the increases in lower frequency components

## Recruitment patterns under high- and low-torque to failure

439 within the signal (Figure. 3). Thus, wavelet-based analysis potentially offers greater insight into how  
440 the patterns of recruitment differ between conditions as a trial progresses towards momentary failure,  
441 and indeed upon reaching momentary failure there was largely similar frequency content between  
442 conditions in our study (Figures. 3 & 4)

443 Our findings are in contrast to the results of recent work using decomposition sEMG. Muddle  
444 et al. (2018) reported that, upon reaching momentary failure, the higher-torque condition typically  
445 resulted in greater recruitment of higher threshold MUs on average. The seemingly discrepant results  
446 may be due to the nature of the analyses performed. With decomposition sEMG, it is possible to  
447 examine the individual firing trains of MUs (4670 MUs in total in the case of Muddle et al.; i.e., ~88  
448 MUs per participant for high torque and ~171 for low torque), whereas the use of wavelet analysis of  
449 bipolar electrodes permits the examination of MU ‘pools’ based upon their frequency characteristics.  
450 Thus, the former allows examination of individual MU recruitment patterns, and the latter permits  
451 examination more broadly of the recruitment patterns of populations of MUs within the muscle.  
452 Further, although the same relative torques were used (30% and 70% of MVC), Muddle et al. (2018)  
453 had participants perform repeated trapezoidal isometric muscle actions whereas we had participants  
454 perform a single continuous isometric action. Motor unit recruitment strategies likely differ between  
455 dynamic and isometric conditions (van Bolhuis et al., 1997; Babault et al., 2006) so they may also  
456 differ between repeated isometric muscle actions and continuous efforts. For example, metabolite  
457 increases are greater during continuous isometric actions compared with intermittent (Schott et al.,  
458 1995) so this might influence recruitment, or at least the signal properties and, thus, the results of  
459 analyses and their interpretation. The results of the present study are similar with those of Muddle et  
460 al. (2018) in that there appeared to be increased MU recruitment across both high- and low-torque  
461 conditions. Indeed, Harmon et al. (2021) also recently reported that recruitment of MUs increased  
462 during low-torque conditions and, at momentary failure, were like that observed during non-failure  
463 high-torque conditions. Our study revealed increases in the signal frequency components of the  
464 individual wavelets, suggesting increased recruitment in both conditions, yet with seemingly different  
465 patterns of recruitment between conditions.

466 With the high-torque condition, though there were increases in lower frequency signal

## Recruitment patterns under high- and low-torque to failure

467 components, there were also reductions in the higher frequency components. This is also perhaps to  
468 be expected as Potvin and Fuglevand (2017) found in their modelling study that loss of force capacity  
469 was always higher in the upper to middle range of MUs. Upon starting the conditions, it is likely that  
470 the higher-torque condition necessitated the recruitment of more, and indeed larger, MUs compared  
471 with the lower-torque condition (Henneman, 1957). As such, the reduction in these higher frequency  
472 components in the higher-torque condition may reflect their fatigue, reduced excitation, changes in  
473 conduction velocity, de-recruitment, and/or firing rate adaptations.

474         It could be argued that our results suggest additional MUs are being recruited in the face of  
475 insidious fatigue in both conditions and that the pools of MUs recruited across the task, and upon  
476 momentary failure, may be similar. Yet, subtle differences in recruitment patterns appear to occur  
477 dependent upon the torque requirements of the conditions. These findings dispute the conclusions  
478 drawn by other investigators interpreting higher sEMG amplitudes as indicating greater MU  
479 recruitment with higher-loads. Further, these results potentially lend support to the explanations  
480 offered regarding MU recruitment to explain the similar adaptations that occur between resistance  
481 exercises with high- and low-loads performed to momentary failure (Carpinelli, 2008; Fisher et al.,  
482 2017; Potvin and Fuglevand, 2017; Morton et al., 2019).

483         Despite our efforts to strictly control our experiment, and perform a rigorous analysis, our  
484 findings may still have been affected by uncontrolled natural factors that affect the sEMG signal.  
485 Specifically, the signal frequency content of sEMG is affected by many factors (muscle fibre depth  
486 and length, pennation angle, cellular environment, temperature, fatigue, motor unit synchronisation).  
487 We were able to control for several of these factors by collecting data on the same day, from the same  
488 individuals, with the same electrode placement and joint angle configuration during an isometric  
489 effort. Thus, factors relating to muscle anatomy (i.e., muscle fibre depth and length) would have been  
490 unlikely to contribute to any differences; though it is possible that small changes in pennation angle  
491 may have occurred due to tendon creep within trials. Further, although muscle temperature was not  
492 measured, participants completed all trials using the same procedures, and in a randomised  
493 counterbalanced fashion, so this did not likely contribute to differences between conditions.

## Recruitment patterns under high- and low-torque to failure

494 As mentioned, fatigue can lead to a reduction in signal frequency content, yet our data  
495 showed distinct patterns between loads which were similar across muscles, thus indicating there are  
496 different physiological processes underlying the signal, including differences in MU recruitment  
497 strategies. MU synchronisation, such as when generating forces rapidly, can also lead to alterations in  
498 the spectral profile of the myoelectric signals. This phenomenon typically leads to a spike in the 30  
499 Hz region. Thus, the ‘synchronous’ MU recruitment that appears to have occurred initially in the  
500 high-load condition may have been influenced by this effect. However, the initial rate of torque  
501 production at the beginning of the trial did not differ substantially between the two load conditions so  
502 firing rate could be expected to be similar in each. Further, we used defined torque threshold to  
503 exclude from analysis the periods of each trial where ramping up/down of torque was occurring at the  
504 start/end. Additionally, when analyses were re-run with wavelets, but with the 30Hz data discarded  
505 (rather than just the first wavelet), it made no difference to our results. As such, it seems the  
506 differences in the results do not reflect differences related to firing rate modulations borne out during  
507 early ramping, or late ramping down, of torque production during trials.

508

### 509 **Conclusions**

510 Wavelet-based analysis of MU recruitment patterns suggest that an increase in recruitment  
511 occurs during both high- and low-torque isometric conditions. Importantly, similar MUs appear to be  
512 recruited in both conditions upon reaching momentary failure as indicated by the similarity in  
513 frequency content at momentary failure. However, patterns of recruitment differ between conditions  
514 with high-torque conditions showing greater initial ‘synchronous’ MU recruitment, yet reduction in  
515 high frequency signal components as trials progressed towards momentary failure and, thus, fatigue of  
516 some larger MUs. Low-load conditions demonstrated increases across all frequency components of  
517 the signal, suggesting ‘sequential’ MU recruitment. Thus, when performing isometric efforts to  
518 momentary failure, our data corroborate modelling studies as well as recent biopsy evidence,  
519 suggesting overall MU recruitment may largely be similar with the highest threshold MUs likely  
520 recruited, despite being achieved with differences in the pattern of recruitment over time utilised.

521

## Recruitment patterns under high- and low-torque to failure

### 522 **References**

- 523 1. Adam A, De Luca CJ. Recruitment order of motor units in human vastus lateralis muscle is  
524 maintained during fatiguing contractions. *J Neurophysiol.* 2003;90:2919-2927. doi:  
525 10.1152/jn.00179.2003.
- 526 2. Amrhein V, Greenland S, McShane B. Scientists rise up against statistical significance.  
527 *Nature.* 2019;567(7748):305-307. doi: 10.1038/d41586-019-00857-9
- 528 3. Amrhein V, Trafimow D, Greenland S. Inferential statistics as descriptive statistics: there is  
529 no replication crisis if we don't expect replication. *Am Stat.* 2019;73:262-270. doi:  
530 10.1080/00031305.2018.1543137
- 531 4. Babault N, Desbrosses K, Fabre MS, Michault A, Pousson M. Neuromuscular fatigue  
532 development during maximal concentric and isometric knee extensions. *J Appl Physiol.*  
533 2006;100(3):780-785. doi: 10.1152/jappphysiol.00737.2005.
- 534 5. Bawa P, Pang MY, Olesen KA, Calancie B. Rotation of motoneurons during prolonged  
535 isometric contractions in humans. *J Neurophysiol.* 2006;96:1135-1140. doi:  
536 10.1152/jn.01063.2005.
- 537 6. Boe SG, Stashuk DW, Doherty TJ. Motor unit number estimation by decomposition-enhanced  
538 spike-triggered averaging: control data, test-retest reliability, and contractile level effects.  
539 *Muscle Nerve.* 2004;29(5):693-699
- 540 7. Brody LR, Pollock MT, Roy SH, De Luca CJ, Celli B. pH-induced effects on median  
541 frequency and conduction velocity of the myoelectric signal. *J Appl Physiol.* 1991;71:1878-  
542 1885. doi: 10.1002/mus.20031.
- 543 8. Carpinelli R. The size principle and a critical analysis of the unsubstantiated heavier-is-better  
544 recommendation for resistance training. *J Exerc Sci Fit.* 2008;6(2):67-86
- 545 9. Chapman M, Larumbe-Zabala E, Gosss-Sampson M, Colpus M, Triplett NT, Naclerio F.  
546 Perceptual, mechanical and electromyographic responses to different relative loads in the  
547 parallel squat. *J Strength Cond Res.* 2019;33(1):8-16. doi: 10.1519/JSC.0000000000001867.

Recruitment patterns under high- and low-torque to failure

- 548 10. Contessa P, De Luca CJ, Kline JC. The compensatory interaction between motor unit firing  
549 behaviour and muscle force during fatigue. *J Neurophysiol.* 2016;116(4):1579-1585. doi:  
550 10.1152/jn.00347.2016.
- 551 11. DeFreitas JM. In regards to motor unit decomposition, are we caring about the right  
552 information? *J Electromyogr Kinesiol.* 2019;47:121-122. doi: 10.1016/j.jelekin.2019.05.001.
- 553 12. De Luca CJ, Nawab SH. Reply to Farina and Enoka: The reconstruct-and-test approach is the  
554 most appropriate validation for surface EMG signal decomposition to date. *J Neurophysiol.*  
555 2011;105:983-984. doi: 10.1152/jn.01060.2010
- 556 13. Del Vecchio A, Negro F, Felici F, Farina D. Associations between motor unit action potential  
557 parameters and surface EMG features. *J Appl Physiol.* 2017;123(4):835-843. doi:  
558 10.1152/jappphysiol.00482.2017.
- 559 14. Denny-Brown D, Pennybacker JB. Fibrillation and fasciculation in voluntary muscle. *Brain.*  
560 1938;61:311–312. doi: 10.1093/brain/61.3.311
- 561 15. Dideriksen JL, Enoka RM, Farina D. Neuromuscular adjustments that constrain submaximal  
562 EMG amplitude at task failure of sustained isometric contractions. *J Appl Physiol.*  
563 2011;111:485-494. doi: 10.1152/jappphysiol.00186.2011.
- 564 16. Dimotrova NA, Domitrov GV. Interpretation of EMG changes with fatigue: facts, pitfalls,  
565 and fallacies. *J Electromyogr Kinesiol.* 2003;13(1):13-36. doi: 10.1016/s1050-  
566 6411(02)00083-4.
- 567 17. Duchateau J, Enoka RM. Human motor unit recordings: Origins and insight into the  
568 integrated motor system. *Brain Res.* 2011;1409:42-61. doi: 10.1016/j.brainres.2011.06.011
- 569 18. Enoka RM, Duchateau J. Inappropriate interpretation of surface EMG signals and muscle  
570 fiber characteristics impedes understanding of the control of neuromuscular function. *J App.*  
571 *Physio.* 2015;119:1516–1518. doi: 10.1152/jappphysiol.00280.2015.
- 572 19. Enoka RM. Physiological validation of the decomposition of surface EMG signals. *J*  
573 *Electromyogr Kinesiol.* 2019;46:70-83. doi: 10.1016/j.jelekin.2019.03.010.
- 574 20. Farina D, Enoka RM. Surface EMD decomposition requires an appropriate validation. *J*  
575 *Neurophysiol.* 2011;105:981-982. doi: 10.1152/jn.00855.2010.

Recruitment patterns under high- and low-torque to failure

- 576 21. Fisher J, Steele J, Smith D. High- and low-load resistance training: Interpretation and  
577 practical application of current research findings. *Sports Med.* 2017;47(3):393-400. doi:  
578 10.1007/s40279-016-0602-1.
- 579 22. Gardner MJ, Altman DG. Confidence intervals rather than P values: estimation rather than  
580 hypothesis testing. *Br Med J (Clin Res Ed).* 1986.15;292(6522):746-50. doi:  
581 10.1136/bmj.292.6522.746. PMID: 3082422; PMCID: PMC1339793.
- 582 23. Gonzalez AM, Ghigiarelli JJ, Sell KM, Shone EW, Kelly CF, Mangine GT. Muscle activation  
583 during resistance exercise at 70% and 90% 1-repetition maximum in resistance trained men.  
584 *Muscle Nerve.* 2017;56(3):505-509. doi: 10.1002/mus.25509.
- 585 24. Gorman RB, McDonagh JC, Hornby TG, Reinking RM, Stuart DG. Measurement and nature  
586 of firing rate adaptation in turtle spinal neurons. *J Comp Physiol A.* 2005; 191: 583–603. doi:  
587 10.1007/s00359-005-0612-1.
- 588 25. Harmon KK, Hamilton AS, Johnson BD, Bartek FJ, Girts RM, MacLennan, RJ, Hahs-Vaughn  
589 DL, Stock MS. Motor unit action potential amplitude during low torque fatiguing contractions  
590 versus high torque non-fatiguing contractions: a multilevel analysis. *Eur J Appl Physiol.*  
591 2021. Epub ahead of print. doi: 10.1007/s00421-021-04606-7
- 592 26. Henneman E. Relation between size of neurons and their susceptibility to discharge. *Science.*  
593 1957;126:1345–1347. doi: 10.1126/science.126.3287.1345.
- 594 27. Hodson-Tole EF, Wakeling JM. Motor unit recruitment for dynamic tasks: current  
595 understanding and future directions. *J Comp Physiol B.* 2009;179:57-66. doi:  
596 10.1007/s00360-008-0289-1.
- 597 28. Hodson-Tole EF, Wakeling JM. Variations in motor unit recruitment patterns occur within  
598 and between muscles in the running rat (*Rattus norvegicus*). *J Exp Biol.* 2007;210:2333-2345.  
599 doi: 10.1242/jeb.004457.
- 600 29. Jenkins ND, Housh TJ, Bergstrom HC, Cochrane KC, Hill EC, Smith CM, Johnson GO,  
601 Schmidt RJ, Cramer JT. Muscle activation during three sets to failure at 80 vs. 30% 1RM  
602 resistance exercise. *Eur J Appl Physiol.* 2015;115(11):2335-2347. doi: 10.1007/s00421-015-  
603 3214-9.

Recruitment patterns under high- and low-torque to failure

- 604 30. Jensen BR, Pilegaard M, Sjøgaard G. Motor unit recruitment and rate coding in response to  
605 fatiguing shoulder abductions and subsequent recovery. *Eur J Appl Physiol.* 2000;83(2-  
606 3):190-199. doi: 10.1007/s004210000278.
- 607 31. Lee SSM, Miara MDB, Arnold AS, Biewener AA, Wakeling JM. EMG analysis tuned for  
608 determining the timing and level of activation in different motor units. *J Electromyogr*  
609 *Kinesiol.* 2011;21(4):557-565. doi: 10.1016/j.jelekin.2011.04.003.
- 610 32. Length LV. emmeans: Estimated Marginal Means, aka Least-Squares Means. R package  
611 version 1.5.3. 2020. <https://CRAN.R-project.org/package=emmeans>
- 612 33. Looney DP, Kraemer WJ, Joseph momentary failure, Comstock BA, Denegar CR, Flanagan  
613 SD, Newton RU, Szivak TK, DuPont WH, Hooper DR, Häkkinen K, Maresh CM.  
614 Electromyographical and perceptual responses to different resistance intensities in a squat  
615 protocol: Does performing sets to failure with light loads produce the same activity? *J*  
616 *Strength Cond Res.* 2016;30(3):792-799. doi: 10.1519/JSC.0000000000001109.
- 617 34. Lüdtke D. ggeffects: Tidy Data Frames of Marginal Effects from Regression Models. J  
618 Open Source Software. 2018;3(26):772. doi: 10.21105/joss.00772 (URL:  
619 <https://doi.org/10.21105/joss.00772>).
- 620 35. McShane BB, Gal D, Gelman A, Robert C, Tackett JL. Abandon statistical significance. *Am*  
621 *Stat.* 2019;73:235-245. doi: 10.1080/00031305.2018.1527253
- 622 36. Mortimer JT, Magnusson R, Petersen I. Conduction velocity in ischemic muscle: effect on  
623 EMG frequency spectrum. *Am J Physiol.* 1970;219:1324–1329. doi:  
624 10.1152/ajplegacy.1970.219.5.1324.
- 625 37. Morton RW, Sonne MW, Faria Zuniga A, Mohammad IYZ, Jones A, McGlory C, Keir PJ,  
626 Potvin JR, Phillips SM. Muscle fibre activation is unaffected by load and repetition duration  
627 when resistance exercise is performed to task failure. *J Physiol.* 2019;597(17):4601-4613. doi:  
628 10.1113/JP278056.
- 629 38. Muddle TWD, Colquhoun RJ, Magrini MA, Luera MJ, DeFreitas JM, Jenkins NDM. Effects  
630 of fatiguing, submaximal high- versus low-torque isometric exercise on motor unit  
631 recruitment and firing behaviour. *Physiol Rep.* 2018;6(8):e13675. doi: 10.14814/phy2.13675.



Recruitment patterns under high- and low-torque to failure

- 632 39. Phinyomark A, Thongpanja S, Hu H, Phukpattaranont P, Limsakul C. The usefulness of mean  
633 and median frequencies in electromyography analysis. In: Naik GR. Computational  
634 intelligence in electromyography analysis. A perspective on current applications and future  
635 challenges. IntechOpen: London, UK. 2012. doi: 10.5772/50639
- 636 40. Pinheiro JC, Bates DM. Linear mixed-effects models: Basic concepts and examples. In.  
637 Pinheiro JC, Bates DM. Mixed-Effects Models in S and S-PLUS. Springer, New York. doi:  
638 10.1007/0-387-22747-4\_1
- 639 41. Potvin J, Fuglevand A. A motor-unit based model of muscle fatigue. PLoS Comput Biol.  
640 2017;13:e1005581. doi: 10.1371/journal.pcbi.1005581.
- 641 42. R Core Team. R: A language and environment for statistical computing. R Foundation for  
642 Statistical Computing, Vienna, Austria. URL: <https://www.R-project.org/>.
- 643 43. Ranniger CU, Akin DL. EMG mean power frequency determination using wavelet analysis.  
644 Proceedings of the 19th Annual International Conference of the IEEE Engineering in  
645 Medicine and Biology Society. 'Magnificent Milestones and Emerging Opportunities in  
646 Medical Engineering'. 1997. doi: 10.1109/IEMBS.1997.757017
- 647 44. Revill AL, Fuglevand AJ. Effects of persistent inward currents, accommodation, and  
648 adaptation on motor unit behavior: a simulation study. J Neurophysiol. 2011; 106: 1467–  
649 1479. doi: 10.1152/jn.00419.2011 PMID: 21697447
- 650 45. Sawczuk A, Powers RK, Binder MD. Spike frequency adaptation studied in hypoglossal  
651 motoneurons of the rat. J Neurophysiol. 1995; 73: 1799–1810. doi:  
652 10.1152/jn.1995.73.5.1799.
- 653 46. Schiaffino S, Reggiani C. Myosin isoforms in mammalian skeletal muscle. J Appl Physiol.  
654 1994;77:493–501. doi: 10.1152/jappl.1994.77.2.493.
- 655 47. Schoenfeld B, Contreras B, Willardson JM, Fontana F, Tiryaki-Sonmez G. Muscle activation  
656 during low- versus high-load resistance training in well trained men. Eur J Appl Physiol.  
657 2014;114:2491-2497. doi: 10.1007/s00421-014-2976-9.

Recruitment patterns under high- and low-torque to failure

- 658 48. Schoenfeld BJ, Contreras B, Vigotsky AD, Ogborn D, Fontana F, Tiryaki-Sonmez G. Upper  
659 body muscle activation during low- versus high-load resistance exercise in the bench press.  
660 *Isokinetics Exerc Sci.* 2016;24(3):217-224. doi: 10.3233/IES-160620
- 661 49. Schott J, McCully K, Rutherford OM. The role of metabolites in strength training. II. Short  
662 versus long isometric contractions. *Eur J Appl Physiol.* 1995;71:337-341. doi:  
663 10.1007/BF00240414.
- 664 50. Steele J, Fisher J, Giessing J, Gentil P. Clarity in reporting terminology and definitions of set  
665 endpoints in resistance training. *Muscle Nerve.* 2017b;56(3):368-374. doi:  
666 10.1002/mus.25557.
- 667 51. van Bolhuis BM, Medendorp WP, Gielen CCAM. Motor unit firing behaviour in human arm  
668 flexor muscles during sinusoidal isometric contractions and movements. *Exp Brain Res.*  
669 1997;117:120-130. doi: 10.1007/s002210050205.
- 670 52. Vigotsky AD, Beardsley C, Contreras B, Steele J, Ogborn D, Phillips SM. Greater  
671 electromyographic responses do not imply greater motor unit recruitment and ‘hypertrophic  
672 potential cannot be inferred. *J Strength Cond Res.* 2017;31(1):e1-e4. doi:  
673 10.1519/JSC.0000000000001249.
- 674 53. Vigotsky AD, Halperin I, Lehman GJ, Trajano GS, Vieira TM. Interpreting signal amplitudes  
675 in surface electromyography studies in sport and rehabilitation sciences. *Front Physiol.*  
676 2018;8:985. doi: 10.3389/fphys.2017.00985.
- 677 54. Vigotsky AD. Concordance Correlation and Cross-Correlation Matrices. 2020. *In*  
678 *preparation.*
- 679 55. von Tschanner V, Goepfert B. Estimation of the interplay between groups of fast and slow  
680 muscle fibers of the tibialis anterior and gastrocnemius muscle while running. *J Electromyogr*  
681 *Kinesiol.* 2006;16(2):188-197. doi: 10.1016/j.jelekin.2005.07.004.
- 682 56. von Tschanner V. Intensity analysis in time-frequency space of surface myoelectric signals by  
683 wavelets of specified resolution. *J Electromyogr Kinesiol.* 2000;10(6):433-445. doi:  
684 10.1016/s1050-6411(00)00030-4.

Recruitment patterns under high- and low-torque to failure

- 685 57. von Tscharnner V. Time-frequency and principal-component methods for the analysis of  
686 EMGs recorded during a mildly fatiguing exercise on a cycle ergometer. *J Electromyogr*  
687 *Kinesiol.* 2002;12(6):479-492. doi: 10.1016/s1050-6411(02)00005-6.
- 688 58. Wakeling JM, Pascual SA, Nigg BM, von Tscharnner V. Surface EMG shows distinct  
689 populations of muscle activity when measured during sustained sub-maximal exercise. *Eur J*  
690 *Appl Physiol.* 2001;86:40-47. doi: 10.1007/s004210100508.
- 691 59. Wakeling JM, Rozitis AJ. Spectral properties of myoelectric signals from different motor  
692 units in the leg extensor muscles. *J Exp Biol.* 2004;207:2519-2528. doi: 10.1242/jeb.01042.
- 693 60. Wakeling JM, Syme DA. Wave properties of action potentials from fast and slow motor units  
694 of rats. *Muscle Nerve* 2002;26:659-668. doi: 10.1002/mus.10263.
- 695 61. Wakeling JM. Patterns of motor unit recruitment can be determined using surface EMG. *J*  
696 *Electromyogr Kinesiol.* 2009a;19:199-207. doi: 10.1016/j.jelekin.2007.09.006.
- 697 62. Wakeling JM. The recruitment of different compartments within a muscle depends on the  
698 mechanics of the movement. *Biol Lett.* 2009b;5(1):30-34. doi: 10.1098/rsbl.2008.0459.
- 699 63. Westad C, Westgaard RH, De Luca CJ. Motor unit recruitment and derecruitment by brief  
700 increase in contraction amplitude of the human trapezius muscle. *J Physiol.* 2003;552:645-  
701 656. doi: 10.1113/jphysiol.2003.044990.
- 702 64. Wilkinson GN, Rogers CE. Symbolic description of factorial models for analysis of variance.  
703 *J Appl Stat.* 1973;22(3):392-399. doi: 10.2307/2346786
